# Supplementary material for: A meta-analysis of 20 years of data on people who inject drugs in metropolitan Chicago to inform computational modeling
Source: bioRxiv or medRxiv preprint supplement (doi:10.1101/2021.02.24.21252385), 2021-03-04
Supplement: Supplementary file [file media-2.pdf]

# A meta-analysis of 20 years of data on people who inject drugs in metropolitan Chicago to inform computational modeling

## Supplemental Figures

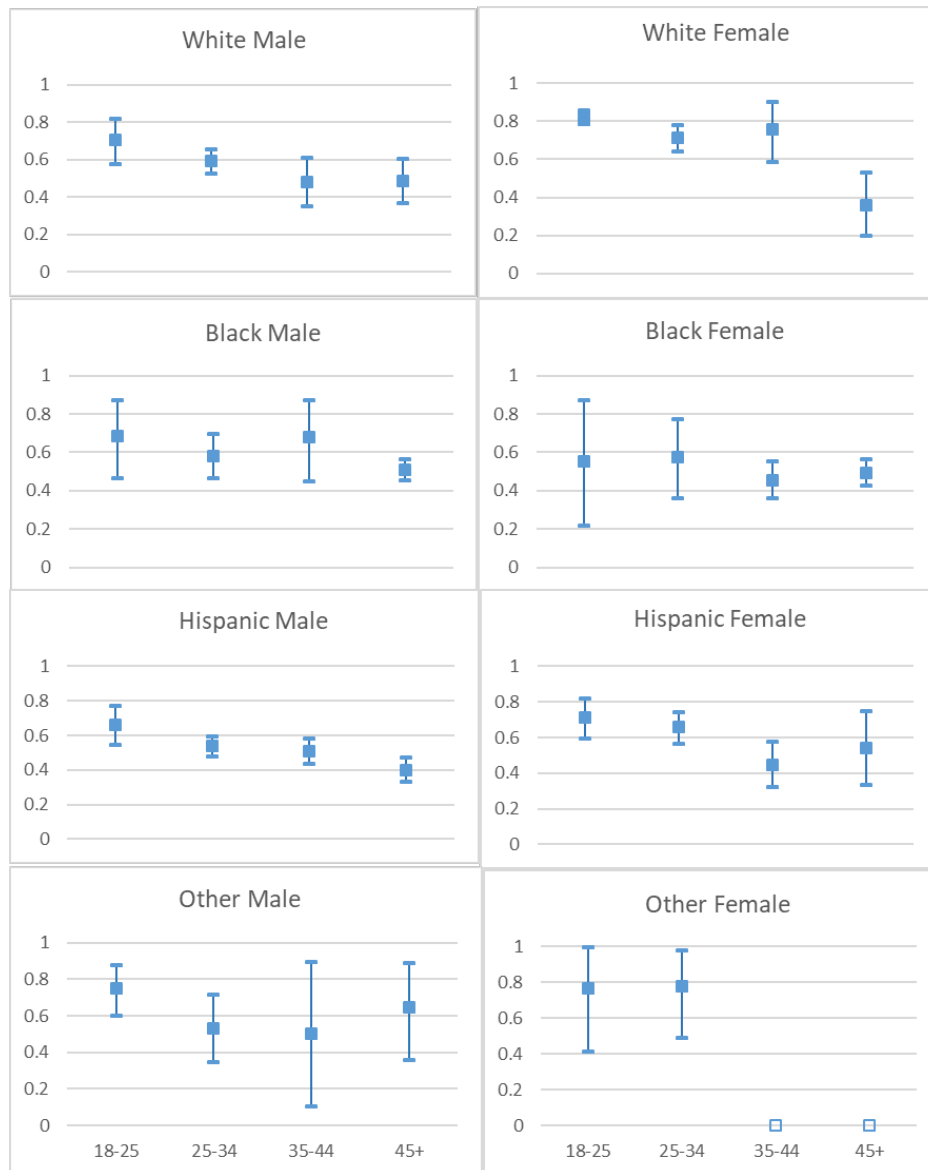

Fig S1. Proportions of PWID reporting equipment sharing

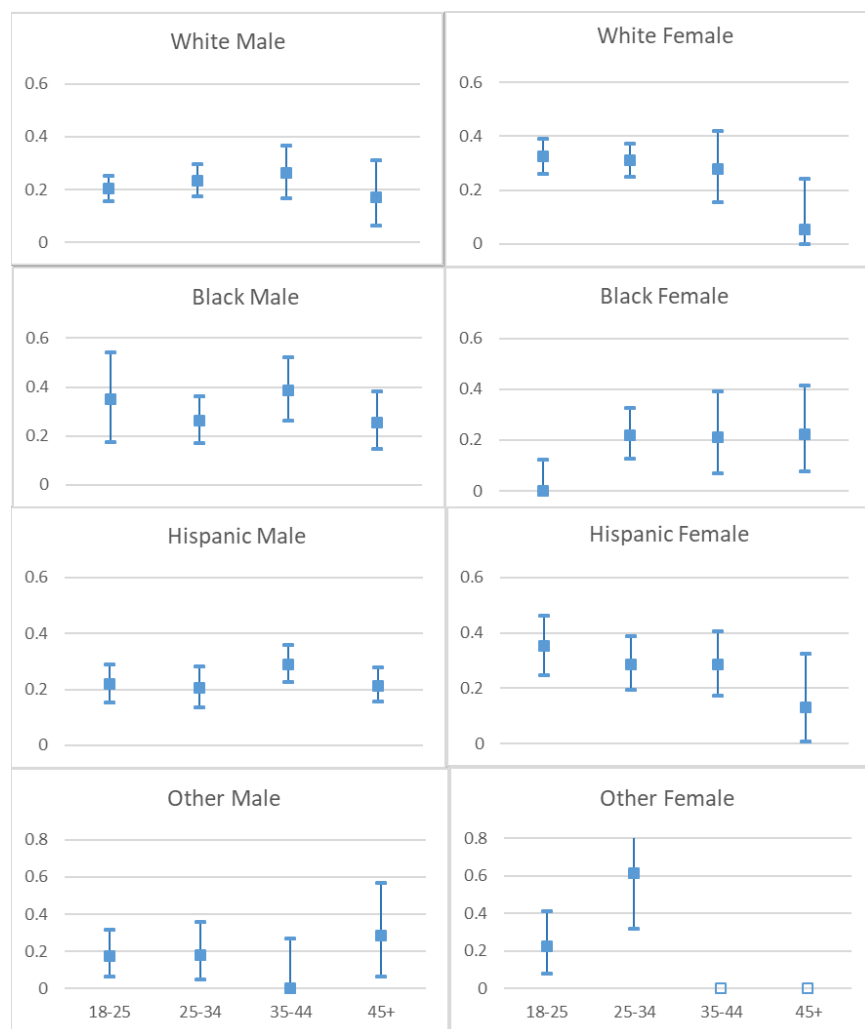

Fig S2. Proportions of PWID reporting syringe mediated drug sharing

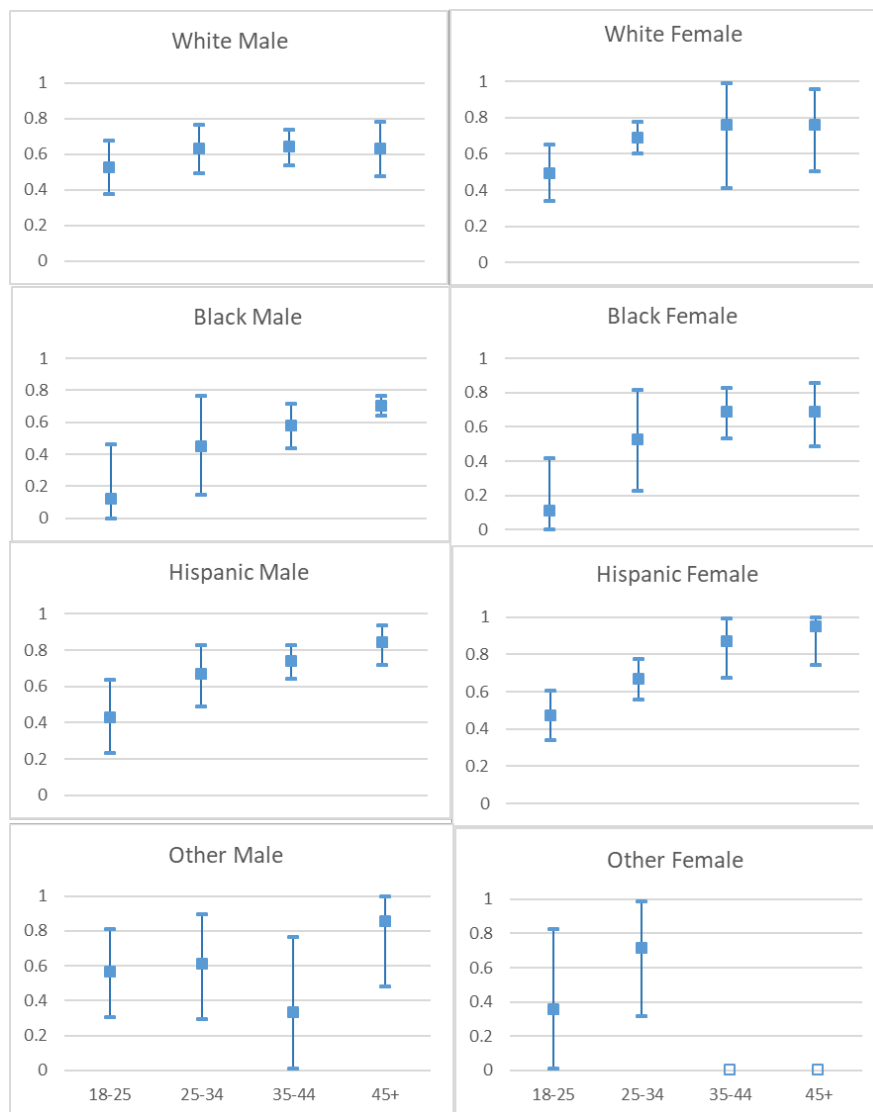

*Fig S3. Obtained syringes from a syringe exchange program*
